# Supplementary material for: Damage-Induced Cell Regeneration in the Midgut of Aedes albopictus Mosquitoes
Source: PubMed Central journal article supplement (PMC5353711; doi:10.1038/srep44594), 2017-03-16
Supplement: srep44594-s1.pdf [file srep44594-s1.pdf]

# **Damage-Induced Cell Regeneration in the Midgut of *Aedes albopictus* Mosquitoes**

**Maria Janeh<sup>1</sup>, Dani Osman<sup>2</sup> and Zakaria Kambris<sup>1\*</sup>**

<sup>1</sup> Biology Department, Faculty of Arts and Sciences, American University of Beirut, Beirut, Lebanon

<sup>2</sup> Faculty of Sciences III and Azm Center for Research in Biotechnology and its Applications, EDST, Lebanese University, 1300, Tripoli, Lebanon

\* for correspondence: [zakaria.kambris@aub.edu.lb](mailto:zakaria.kambris@aub.edu.lb)

**Supplementary Figure 1:**

**Bacterial feeding increases the number of PH3 positive cells in the guts of adult *A. albopictus***

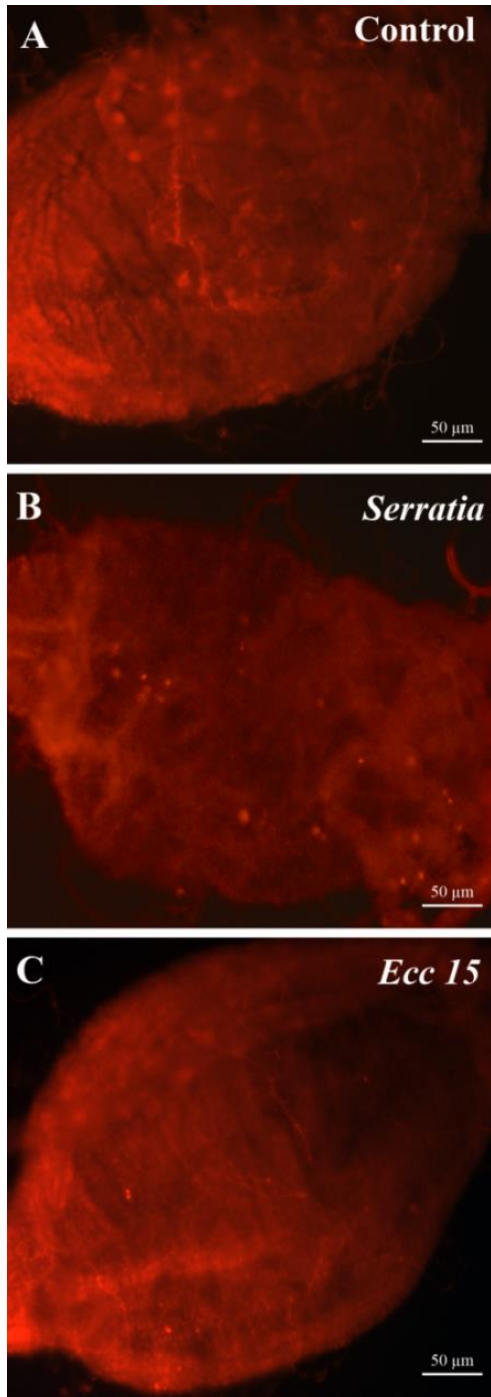

**Supplementary Figure 1: Bacterial feeding increases the number of PH3 positive cells in the guts of adult *A. albopictus***

The number of proliferating cells in the midgut increases after feeding the mosquitoes on a sucrose solution containing a high concentration of *S. marcescens* (B) or *Ecc15* (C) for 24 h as compared to the midguts of control mosquitoes (A) (The figures shown are representative of 26 guts analyzed for *S. marcescens* and 19 guts for *Ecc15*; the complete statistics are shown in Figure 4).
